# Supplementary material
Source: Springer Nature journal article supplement (https://www.springermedizin.de/resource/supplementary/13058_2013_3581_MOESM4_ESM.pdf/9703860)

**(A) Whole series**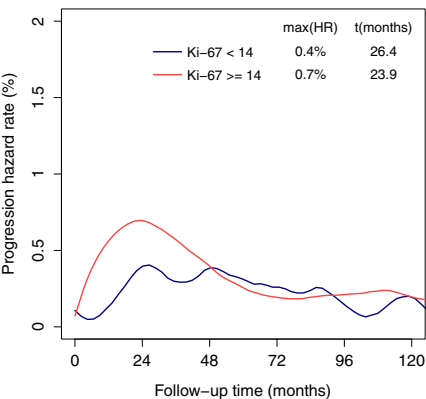**(B) Luminal**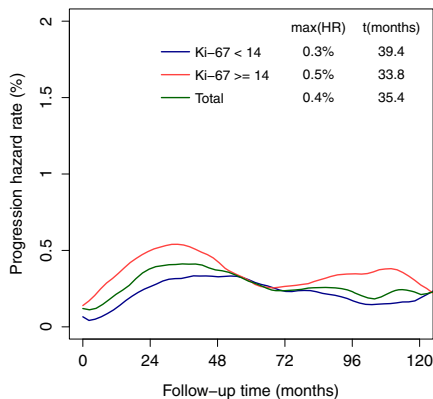**(C) HER-2**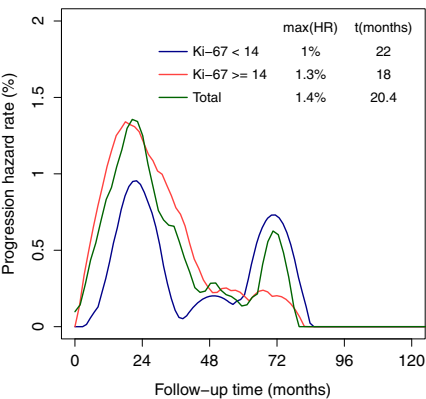**(D) Triple Negative**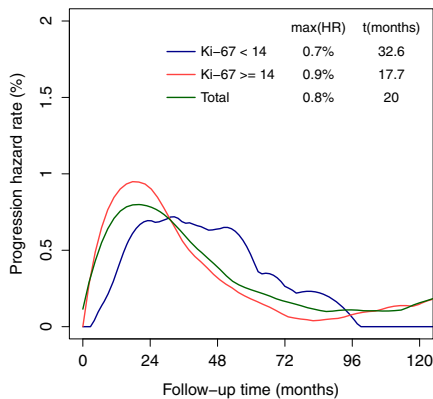

Supplement: MOESM4 [file 9703860]
